# Supplementary material for: Multifunctional separator modified with catalytic multishelled structural CoS2 enables a stable lithium–sulfur battery
Source: Royal Society of Chemistry journal article supplement (doi:10.1039/d4qi02340d), 2024-01-01
Supplement: d4qi02340d1.pdf [file d4qi02340d1.pdf]

## Supplementary Information

### Multifunctional separator modified with catalytic multishelled structural CoS<sub>2</sub> enables stable lithium-sulfur battery

#### Experimental

**Synthesis of Co<sub>3</sub>O<sub>4</sub> hollow multishelled structures (Co<sub>3</sub>O<sub>4</sub> HoMS):** All reagents (purchase from Beijing Chemical Co., Ltd.) were analytical grade and used without further purification. Cobalt acetate tetrahydrate (Co(Ac)<sub>2</sub>·4H<sub>2</sub>O) was used as the metal precursor. Using the synthesis of the triple-shelled Co<sub>3</sub>O<sub>4</sub> hollow microspheres as an example<sup>1</sup>, a typical synthesis process was described as follows. The diameter of 2-3 μm carbonaceous microspheres (CMSs) were synthesized through the emulsion polymerization reaction under hydrothermal conditions. CMSs (0.6 g) were dispersed in 1 M cobalt acetate solution (water/ethanol = 1:3, v/v, 30 mL) with the aid of ultrasonication. After that, the resulting suspension was transferred to 30 °C water bath and stirred for 12 h, then filtered, washed with deionized water for three times, and dried at 80 °C for 12 h. The microspheres after absorbed cobalt ions were heated to 400 °C in air at the rate of 1 °C min<sup>-1</sup>, and kept at 400 °C for 2 h. Finally, the triple-shelled Co<sub>3</sub>O<sub>4</sub> hollow microspheres was prepared. The synthesis processes of single-, and double-shelled Co<sub>3</sub>O<sub>4</sub> hollow microspheres are similar to which of the triple-shelled Co<sub>3</sub>O<sub>4</sub> hollow microspheres. Single-, and double-shelled Co<sub>3</sub>O<sub>4</sub> hollow microspheres were synthesized by changing the solvent ratio (water/ethanol = 1:0 and 1:1, respectively) and using the same thermal procedure described above.

**Synthesis of CoS<sub>2</sub> hollow multishelled structures (CoS<sub>2</sub> HoMS):** CoS<sub>2</sub> HoMS were prepared via an atom-exchange process. The as-prepared Co<sub>3</sub>O<sub>4</sub> HoMS were sulfurated by thermal vaporization of sulfur powder under argon atmosphere. The detail procedures are as follows: 40 mg of Co<sub>3</sub>O<sub>4</sub> HoMS and 600 mg of sulfur powder

were put two separate positions in a porcelain boat with sulfur powder at the upstream side of the tube furnace. After that, another porcelain boat was put on it and wrapped it by aluminum foil. Then, the samples were annealed at 400 °C for 2 h with a heating rate of 5 °C min<sup>-1</sup> under argon atmosphere. Finally, CoS<sub>2</sub> HoMS were obtained after cooling to room temperature naturally and kept it in drying conditions.

**Synthesis of CoS<sub>2</sub> nanoparticles (CoS<sub>2</sub> NP):** For comparison, we also prepared CoS<sub>2</sub> NP by sulfurizing Co<sub>3</sub>O<sub>4</sub> nanoparticles. First, we synthesized Co<sub>3</sub>O<sub>4</sub> NP according to previous articles<sup>2</sup>. Briefly, 2 g of Co(CH<sub>3</sub>COO)<sub>2</sub>·4H<sub>2</sub>O was dissolved in a solution containing 25 ml of water and 10 ml of ammonia. Then the suspension was transferred into 50 ml autoclave and hydrothermal reaction at 150 °C for 3 h. After that, the autoclave was cooled to room temperature naturally. The resulting black solid products were washed with water via centrifugation, dried at 70 °C for 12 h, and collected for characterization. Finally, the CoS<sub>2</sub> NP was prepared by sulfuration according to the method of CoS<sub>2</sub> HoMS.

**Fabrication of different modified separators:** The CoS<sub>2</sub> HoMS modified separators were fabricated by vacuum filtration. Typically, 6 mg CoS<sub>2</sub> HoMS and 1 mg carbon nanotubes were dispersed into N-methyl-2-pyrrolidone (NMP) at a concentration of 0.4 mg mL<sup>-1</sup> by sonication for 2 h. Then, the obtained suspension was mixed with 1 mg polyvinylidene fluoride (PVDF) and vacuum filtered onto one side of a commercial PP membrane (Celgard 2400). The obtained CoS<sub>2</sub> HoMS modified separator was dried in a vacuum oven at 70 °C overnight and punched into disks with a diameter of 16 mm. The areal loading of CoS<sub>2</sub> HoMS was 0.3-0.4 mg cm<sup>-2</sup>. For comparison, the CoS<sub>2</sub> NP modified separators were also prepared by the similar process with a similar loading.

#### **Materials characterization:**

Powder X-ray diffraction (XRD) patterns were recorded on a Panalytical X'Pert-pro MPD X-ray powder diffractometer using Cu K $\alpha$  radiation ( $\lambda=1.54056$  Å). Scanning electron microscope (SEM) was performed on a JEOL JSM-7800F scanning electron microscope. Transmission electron microscope (TEM) was performed on JEOL

JEM-2100F electron microscope operated at 200 kV. X-ray photoelectron spectroscopy (XPS) was performed under a normal mode by using a K-Alpha (Thermo Scientific Inc. UK) XPS system with monochromatic Al K $\alpha$  X-ray. All XPS spectra are corrected using the C 1s line at 284.8 eV, followed by curve fitting and background subtraction.

**Li<sub>2</sub>S<sub>6</sub> diffusion test:** The Li<sub>2</sub>S<sub>6</sub> solution was prepared by adding Li<sub>2</sub>S and S with a molar ratio of 1:5 into a solution containing 1,3-dioxolane (DOL) and dimethoxyethane (DME) (1:1, v/v). A brownish-red Li<sub>2</sub>S<sub>6</sub> solution was obtained after vigorous stirring overnight at 70 °C. For the diffusion test, we used H-type visualized glass vessel. CoS<sub>2</sub> HoMS modified separators or common PP separators was put middle of this glass cell. One side of this vessel added pure DOL/DME solvent and the other side added containing Li<sub>2</sub>S<sub>6</sub> DOL/DME solvent. All of the above steps were operated in an argon-filled glove box.

**Symmetrical battery assembly and measurements:** Symmetric cells were assembled with two identical electrodes that consisted of a mixture of 80 wt% of CoS<sub>2</sub> HoMS or carbon nanotubes (CNT), 10 wt% CNT, and 10 wt % of poly(vinylidene fluoride) (PVDF). The active material mass loading was about 1.0 mg cm<sup>-2</sup>. The electrolyte used DOL/dimethoxyethane (1:1, v/v) as solvent and added 1M LiTFSI and 0.5 M Li<sub>2</sub>S<sub>6</sub> as solute. Cyclic voltammetry (CV) was performed between -1.5 V and 1.5 V at a scan rate of 5 mV s<sup>-1</sup>.

#### **Electrochemical measurements:**

To prepare the sulfur electrodes, 60 wt% sublimed sulfur, 30 wt% CNT, and 10 wt% PVDF were mixed in an agate mortar using N-methyl-2-pyrrolidone (NMP) as solvent to form homogeneous slurry, which was then uniformly coated onto an Al foil and dried in a vacuum oven at 70 °C for 12 h. CR2032-type coin cells were assembled in an Ar-filled glove box with the S/CNT cathode, modified separator or PP separator, and lithium anode for the electrochemical evaluations. The electrolyte was 1.0 M LiTFSI in DOL: DME=1:1 Vol% with 2.0% LiNO<sub>3</sub>. The ratio of electrolyte to sulfur (E/S) was 10 mL g<sup>-1</sup>. The galvanostatic charge–discharge measurements were tested

on a Neware battery testing system. The cyclic voltammetry and electrochemical impedance spectroscopy were measured by electrochemical workstation (CHI 604C).

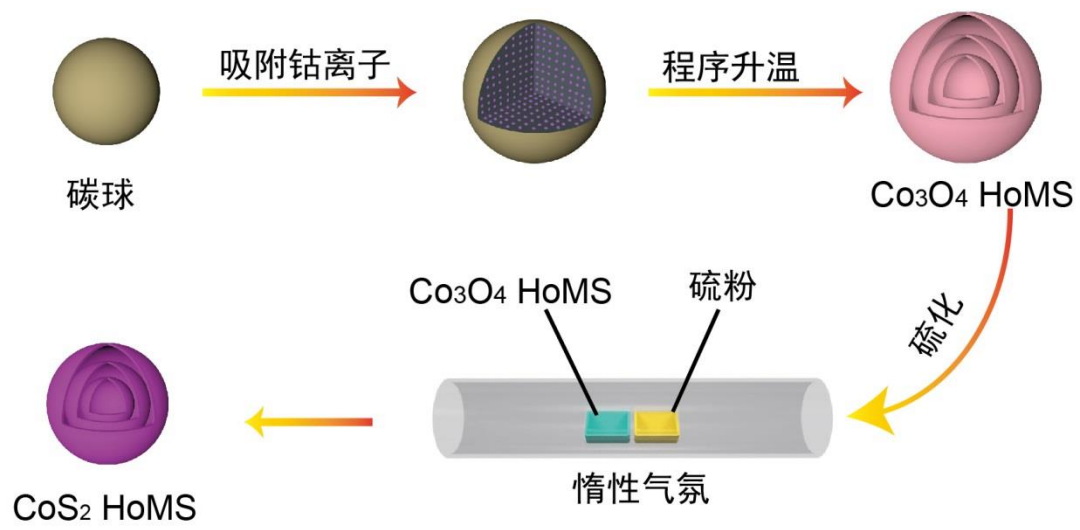

**Figure S1.** Schematic illustration of the preparation procedures of CoS<sub>2</sub> HoMS.

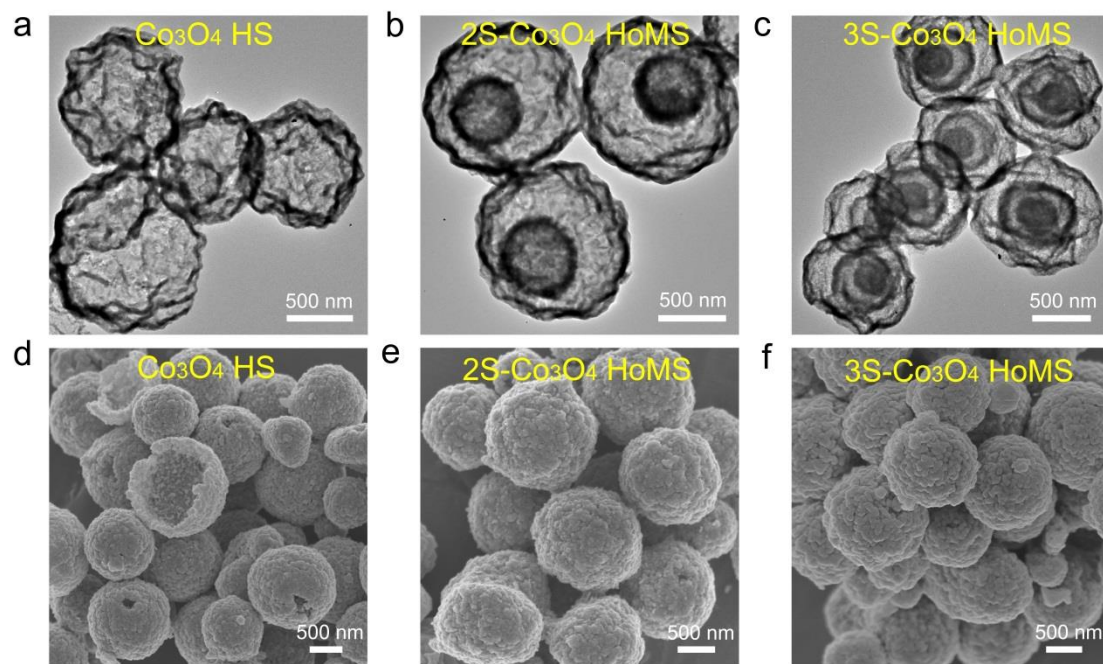

**Figure S2.** (a,b,c) TEM and (d,e,f) SEM images of single (1S-), double (2S-), and triple (3S-) shelled  $\text{Co}_3\text{O}_4$  HoMS.

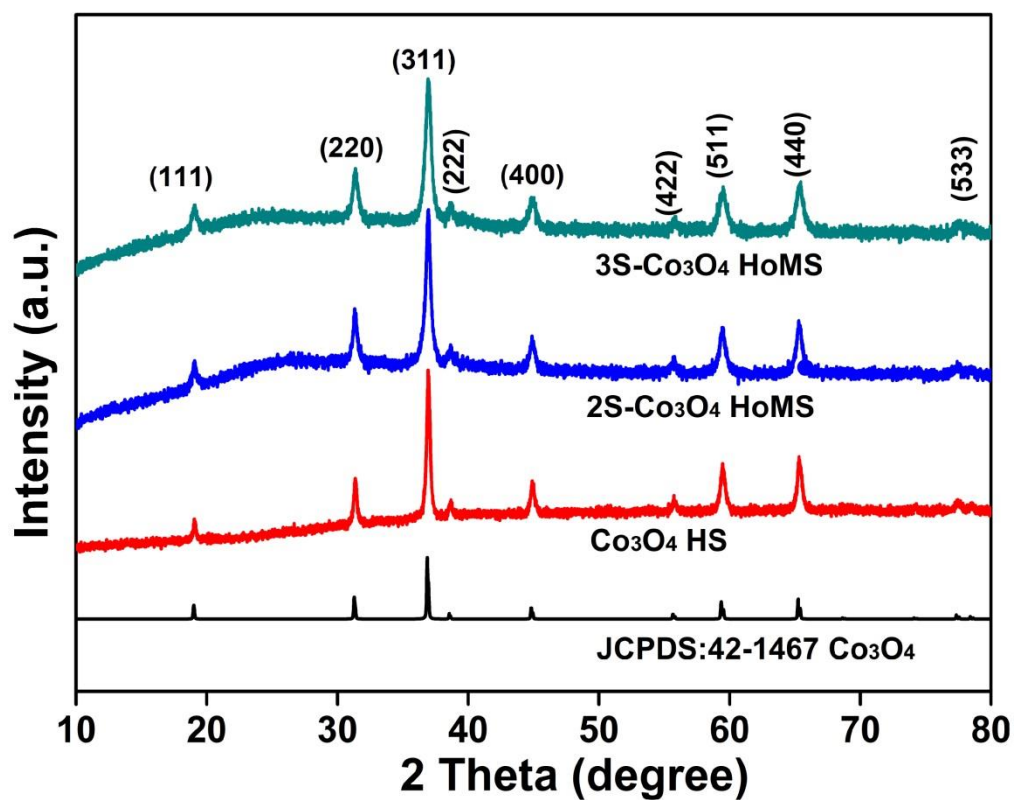

**Figure S3.** The XRD patterns of the as-prepared i) 1S-, ii) 2S-, and iii) 3S-shelled Co<sub>3</sub>O<sub>4</sub> HoMS.

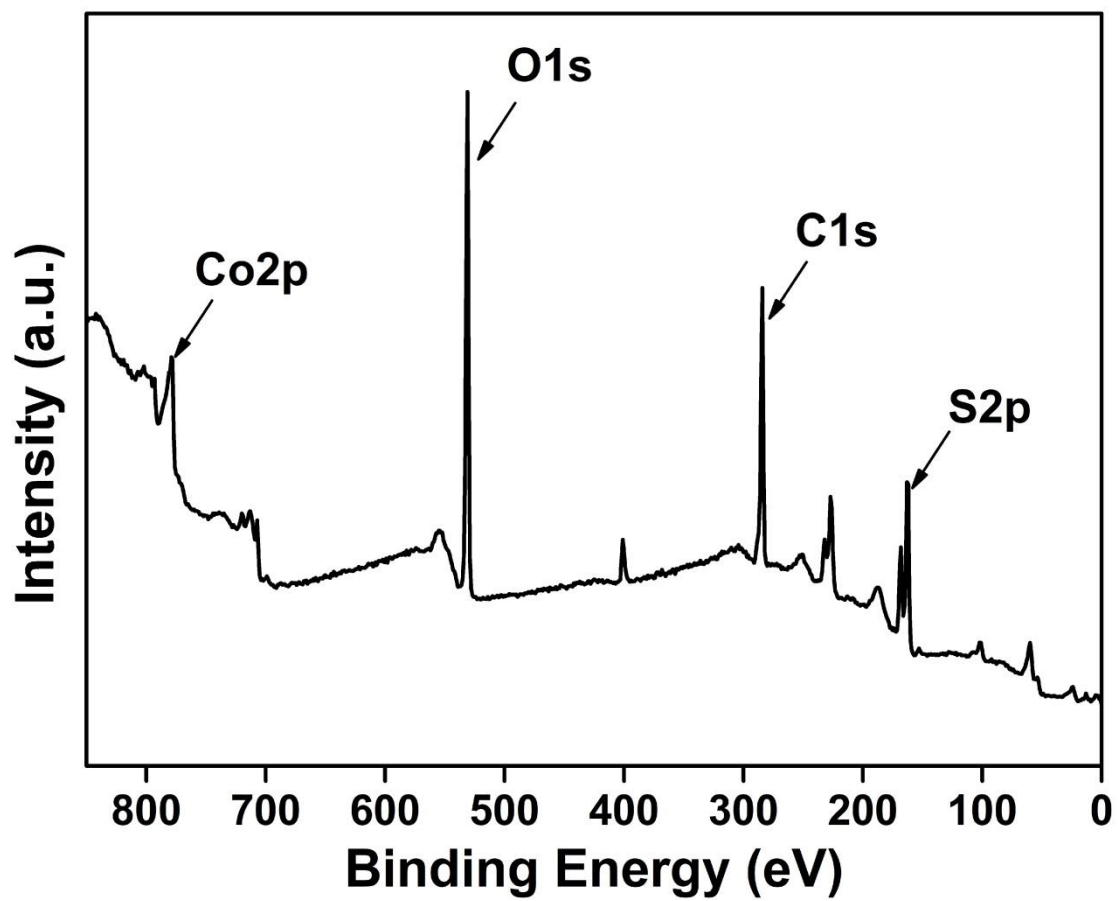

Figure S4. XPS patterns of the 3S-CoS<sub>2</sub> HoMS.



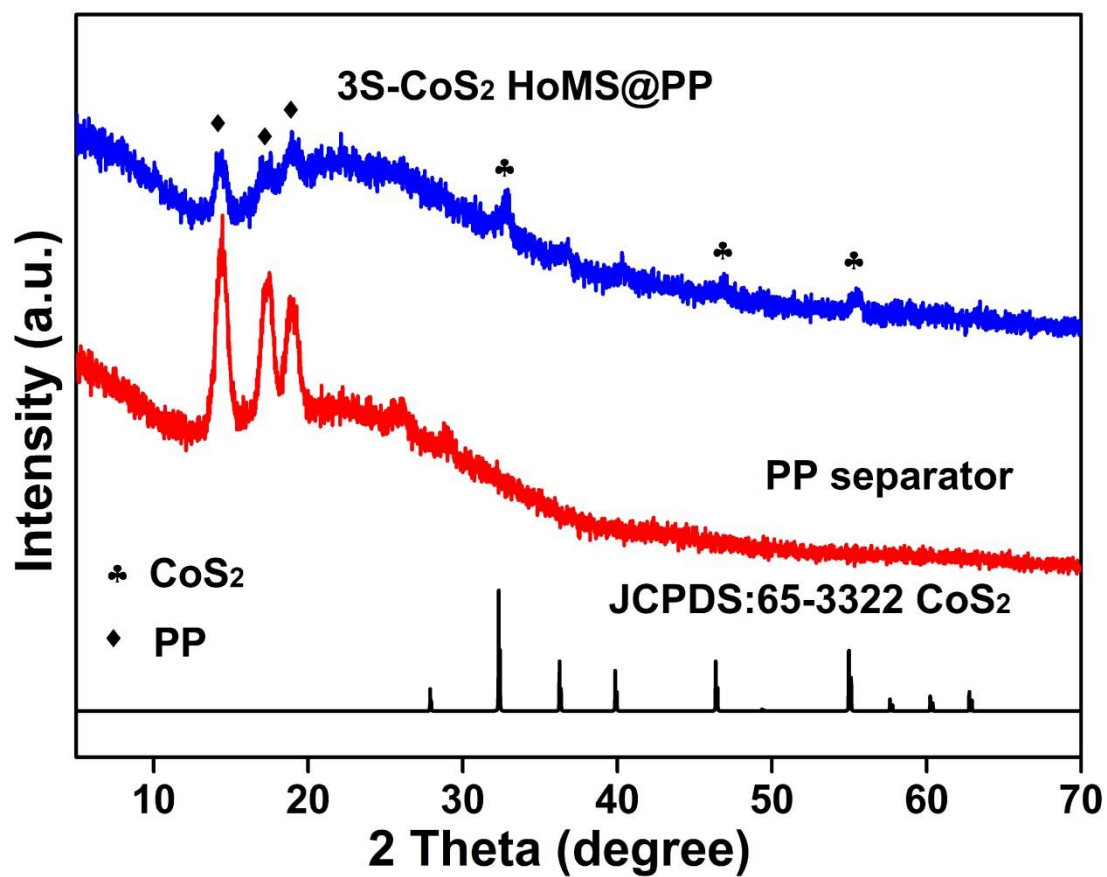

Figure S5. The XRD patterns of PP separator and 3S-CoS<sub>2</sub> HoMS modified separator.

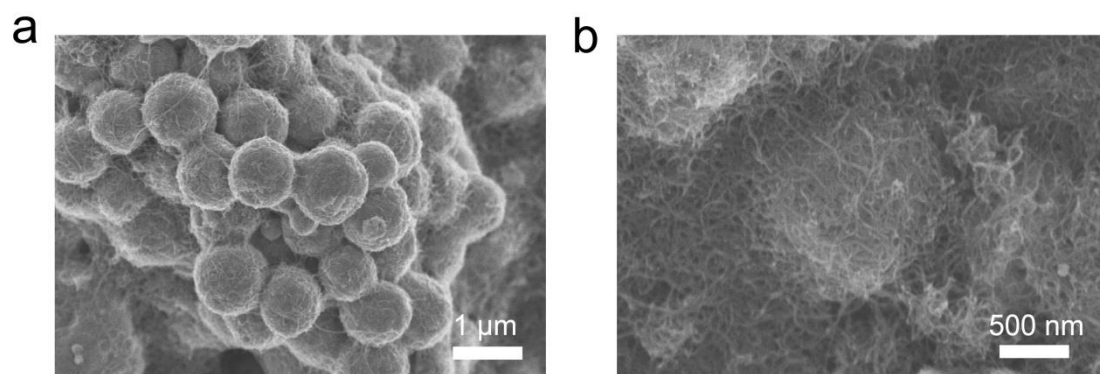

**Figure S6.** Magnified SEM images of the top surface of 3S-CoS<sub>2</sub> HoMS modified separator at different region.

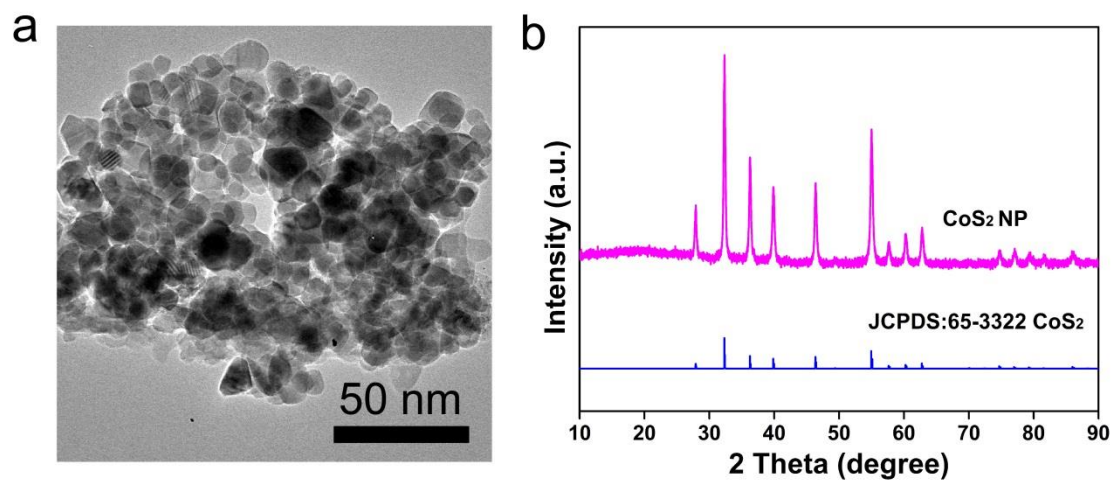

**Figure S7.** TEM images (a) and XRD patterns (b) of CoS<sub>2</sub> NP.

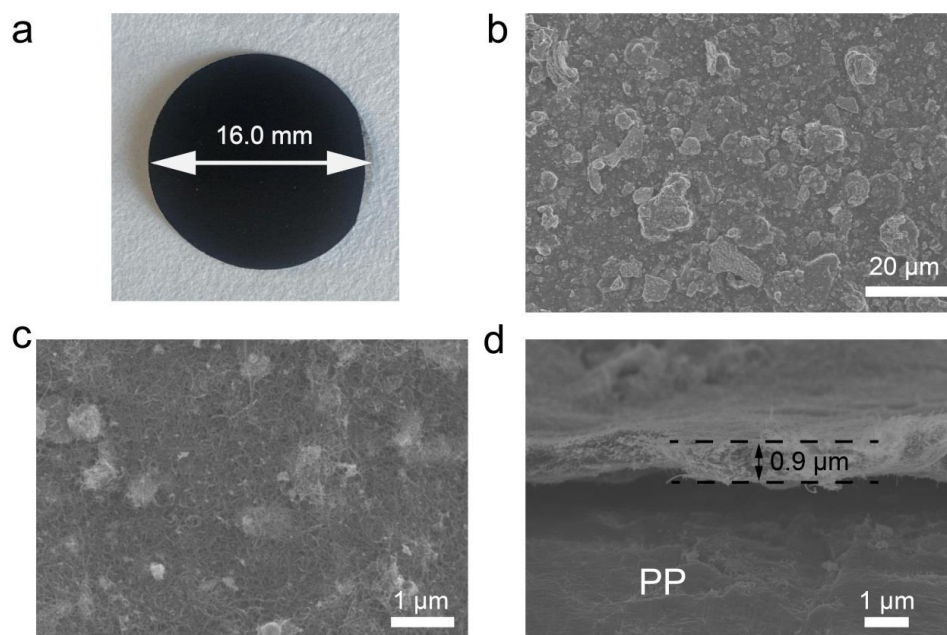

**Figure S8.** (a) Photograph, and (b-d) SEM images of CoS<sub>2</sub> NP modified PP separator (b-c, top surface and d, cross section).

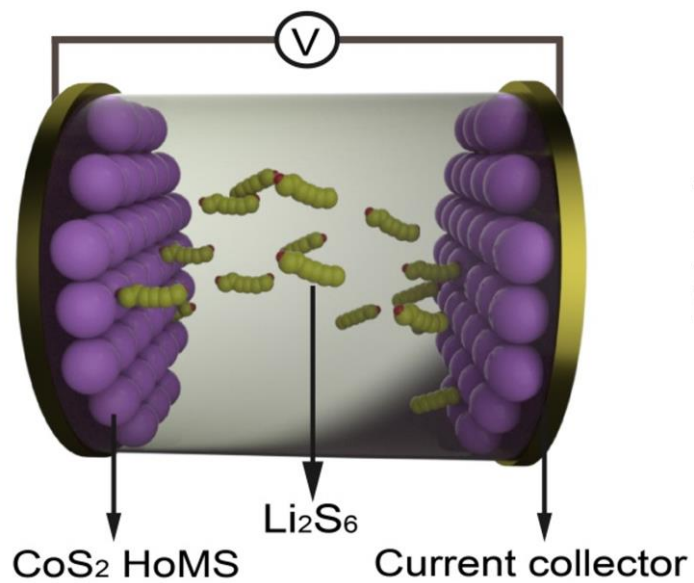

**Figure S9.** Schematic of symmetric battery using two identical electrodes loaded with 3S-CoS<sub>2</sub> HoMS or CNT.

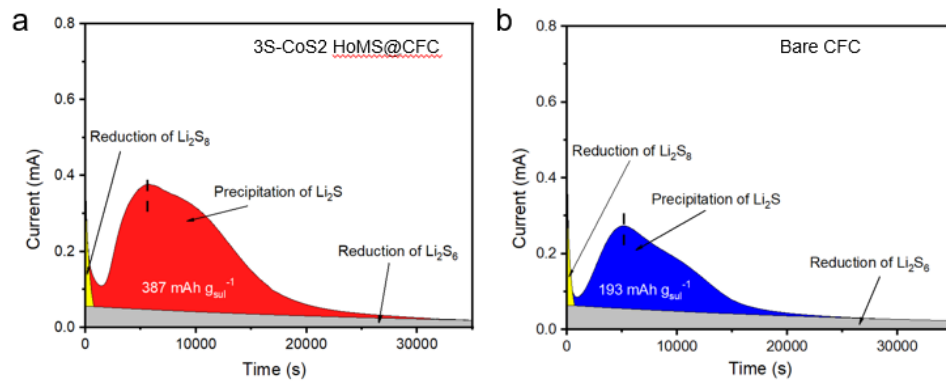

**Figure S10.** Fitting of current vs. time curves for a potentiostatic discharge at 2.02 V. Cells were fabricated with (a) 3S-CoS<sub>2</sub> HoMS modified separator or (b) unmodified separator.

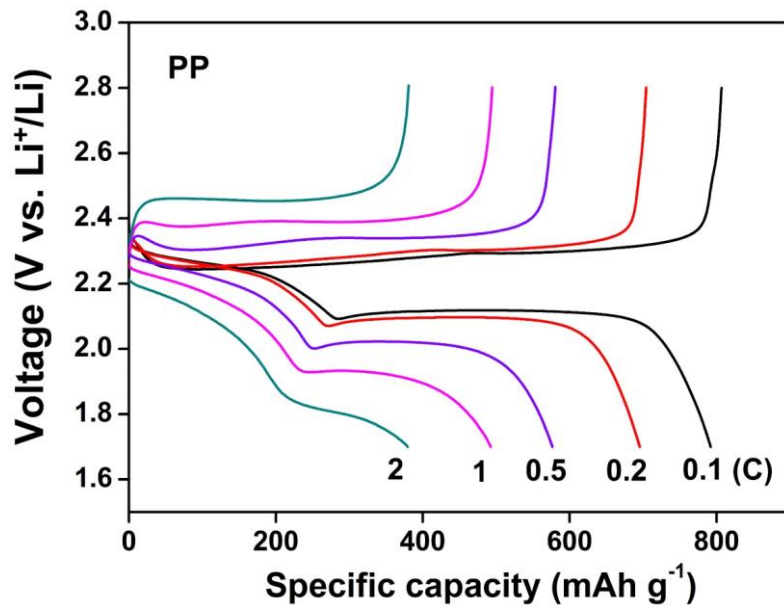

**Figure S11.** Galvanostatic charge–discharge profiles of battery with PP separator at different current densities.

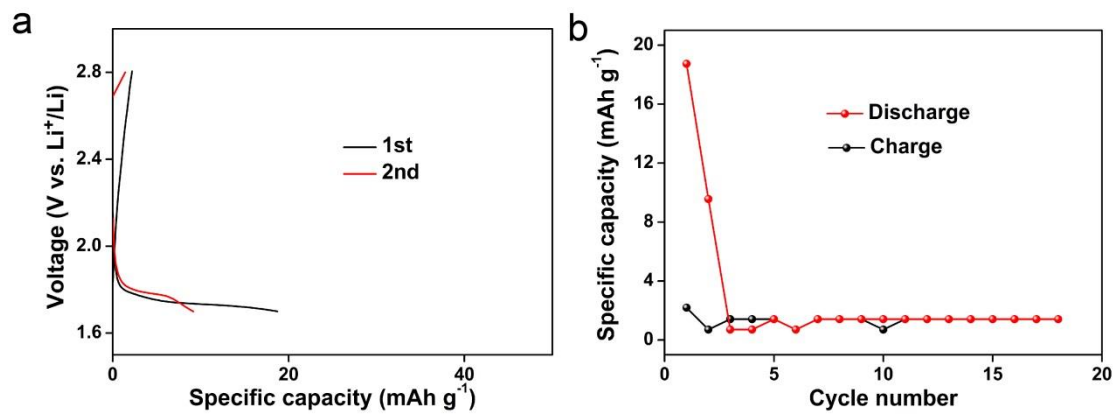

**Figure S12.** (a) Galvanostatic charge–discharge curves and (b) cycling performance curves of the 2S-CoS<sub>2</sub> HoMS at a current density of 200 mA g<sup>-1</sup> in the voltage of 1.7–2.8 V.



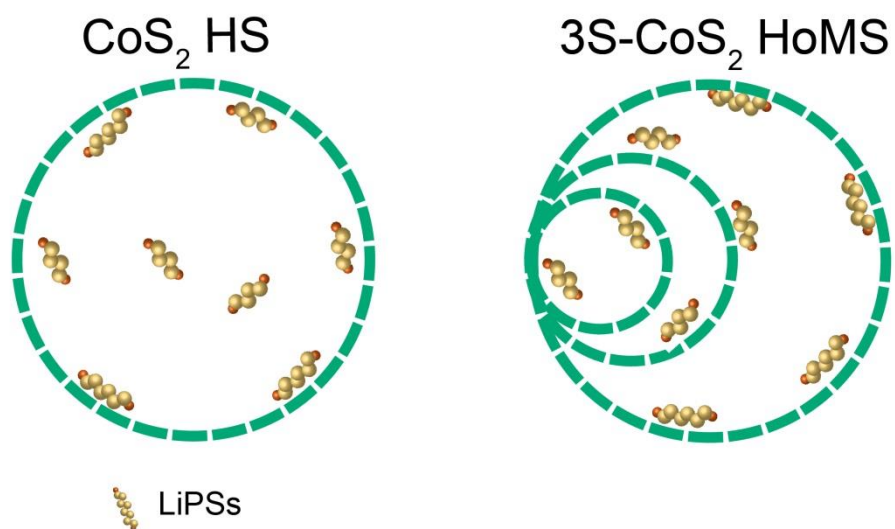

**Figure S13.** Schematic illustration of CoS<sub>2</sub> HS and 3S-CoS<sub>2</sub> HoMS adsorbed LiPSs.

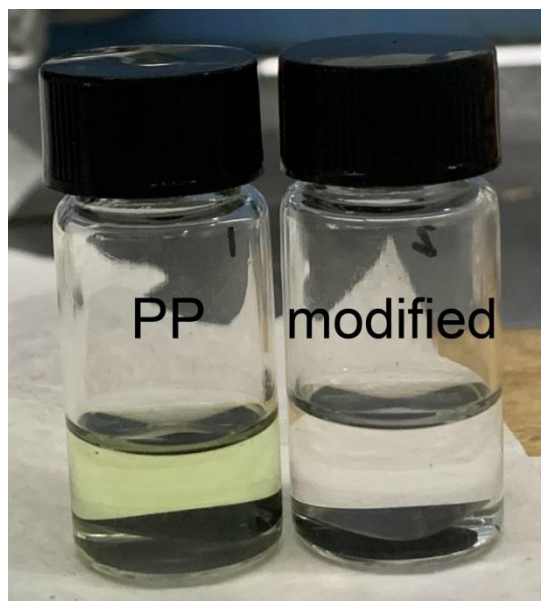

**Figure S14.** Photographs of cycled S electrodes (at the state of charge) with PP separator and 3S-CoS<sub>2</sub> HoMS modified separator in DME/DOL solvent.

**Table S1.** Different resistances of symmetric battery were obtained from the equivalent circuit in Figure 3b.

| Parameters | CNT   | 3S-CoS <sub>2</sub> HoMS |
|------------|-------|--------------------------|
| R1         | 4.3   | 3.5                      |
| R2         | 110.6 | 68.0                     |
| W1         | 56    | 51.7                     |

**Table S2.** Values of lithium ion diffusion coefficients for the Li-S batteries with PP and 3S-CoS<sub>2</sub> HoMS coated separators.

| Parameters                                                                | PP                   | 3S-CoS <sub>2</sub> HoMS modified |
|---------------------------------------------------------------------------|----------------------|-----------------------------------|
| D <sub>Li<sup>+</sup></sub> at peak C1 [cm <sup>2</sup> s <sup>-1</sup> ] | 2.1×10 <sup>-8</sup> | 4.5×10 <sup>-8</sup>              |
| D <sub>Li<sup>+</sup></sub> at peak C2 [cm <sup>2</sup> s <sup>-1</sup> ] | 6.4×10 <sup>-9</sup> | 3.7×10 <sup>-8</sup>              |
| D <sub>Li<sup>+</sup></sub> at peak A2 [cm <sup>2</sup> s <sup>-1</sup> ] | 5.1×10 <sup>-8</sup> | 2.5×10 <sup>-7</sup>              |

**Table S3.** Different resistances of Li-S battery were obtained from the equivalent circuit in Figure 4c.

| Parameters | PP    | CoS <sub>2</sub> | CoS <sub>2</sub> | 2S-CoS <sub>2</sub> | 3S-CoS <sub>2</sub> |
|------------|-------|------------------|------------------|---------------------|---------------------|
|            |       | NP@PP            | HS@PP            | HoMS@PP             | HoMS@PP             |
| R1         | 3.2   | 2.9              | 5.1              | 7.6                 | 2.0                 |
| R2         | 134.8 | 75.5             | 72.7             | 56.6                | 40.5                |
| W1         | 55.8  | 46.4             | 88.4             | 69.2                | 11.0                |

## References

- [1] Wang J., Yang N., Tang H., Dong Z., Jin Q., Yang M., Kisailus D., Zhao H., Tang Z., Wang D., *Angew Chem Int Ed* **2013**, *52*, 6417.
- [2] Dong Y., He K., Yin L., Zhang A., *Nanotechnology* **2007**, *18*, 435602.
